# Supplementary material for: Perovskite photodetectors prepared by flash evaporation printing
Source: Royal Society of Chemistry journal article supplement (doi:10.1039/c7ra04061j), 2017-01-01
Supplement: c7ra04061j1.pdf [file c7ra04061j1.pdf]

**Supporting Information**

**Perovskite Photodetectors Prepared by Flash  
Evaporation Printing**

Haoming Wei,<sup>ab</sup> He Ma,<sup>c</sup> Meiqian Tai,<sup>b</sup> Yang Wei,<sup>a\*</sup> Dongqi Li,<sup>a</sup> Xingyue Zhao,<sup>b</sup> Hong Lin,<sup>b\*</sup>  
Shoushan Fan<sup>abd</sup> and Kaili Jiang<sup>ad\*</sup>

<sup>a</sup> State Key Laboratory of Low-Dimensional Quantum Physics, Department of Physics & Tsinghua-Foxconn Nanotechnology Research Center, Tsinghua University, Beijing 100084, China.

<sup>b</sup> State Key Laboratory of New Ceramics and Fine Processing, School of Materials Science and Engineering, Tsinghua University, Beijing 100084, China.

<sup>c</sup> College of Applied Sciences, Beijing University of Technology, Beijing 100124, China.

<sup>d</sup> Collaborative Innovation Center of Quantum Matter, Beijing 100084, China.

\* Corresponding authors.

E-mail: WeiYang@tsinghua.edu.cn; hong-lin@tsinghua.edu.cn; JiangKL@tsinghua.edu.cn

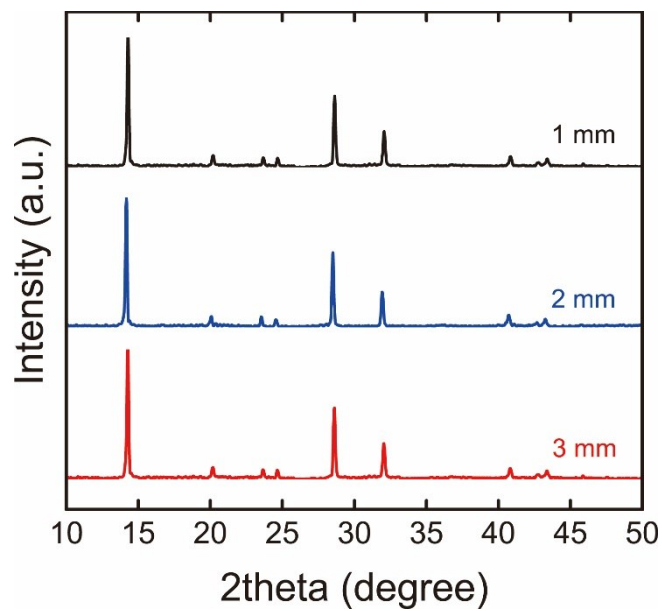

**Fig. S1** XRD patterns of the perovskite thin films evaporated through different distances between the source and the substrate.

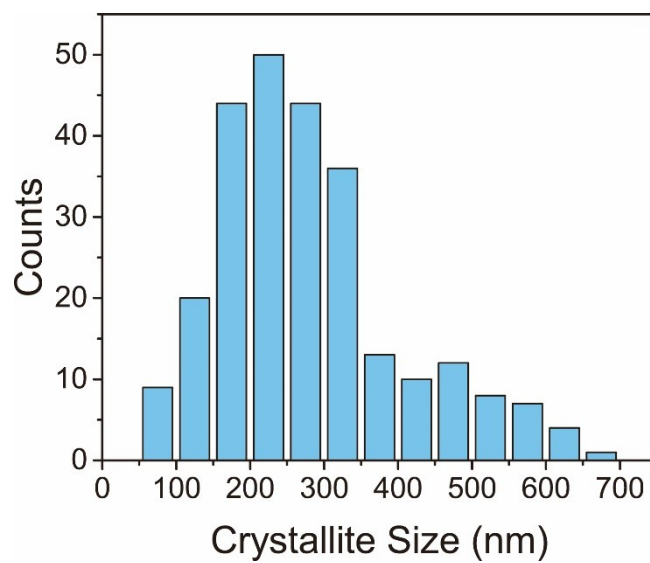

**Fig. S2** Crystallite size distribution of the perovskite thin film in Fig. 2a.

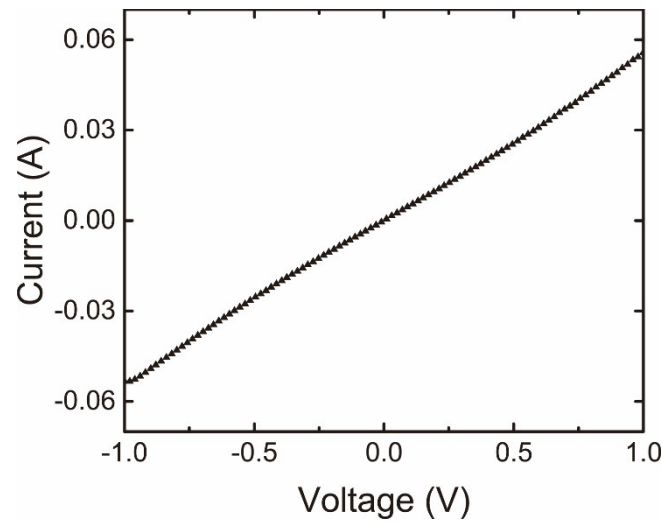

**Fig. S3** *I-V* characteristics of the FTO/MAPbI<sub>3</sub>/Au device for determination of the electrical conductivity.
